# Supplementary material for: MoS2 with Stable Photoluminescence Enhancement under Stretching via Plasmonic Surface Lattice Resonance
Source: MDPI journal article supplement (doi:10.3390/nano11071698), 2021-06-28
Supplement: s1 [file s1]

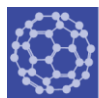

# MoS<sub>2</sub> with Stable Photoluminescence Enhancement under Stretching via Plasmonic Surface Lattice Resonance

Yen-Ju Chiang <sup>1,2</sup>, Tsan-Wen Lu <sup>1,2,\*</sup>, Pin-Ruei Huang <sup>1,2</sup>, Shih-Yen Lin <sup>3</sup> and Po-Tsung Lee <sup>1,2,\*</sup>

<sup>1</sup> Department of Photonics, College of Electrical and Computer Engineering, National Yang Ming Chiao Tung University, Rm. 401 CPT Building, 1001 Ta-Hsueh Road, Hsinchu 300093, Taiwan; steves090003@gmail.com (Y.-J.C.); ping621.di98g@g2.nctu.edu.tw (P.-R.H.)

<sup>2</sup> Department of Photonics, College of Electrical and Computer Engineering, National Chiao Tung University, Rm. 401 CPT Building, 1001 Ta-Hsueh Road, Hsinchu 300093, Taiwan

<sup>3</sup> Research Center for Applied Sciences, Academia Sinica, No. 128, Sec. 2, Academia Rd, Taipei 11529, Taiwan; shihyen@gate.sinica.edu.tw

\* Correspondence: tsanwenlu@gmail.com (T.-W.L.); potsung@mail.nctu.edu.tw (P.-T.L.)

## Supplementary Note 1: Preparation of Large-Area MoS<sub>2</sub> Monolayer on a Sapphire Substrate

To prepare the MoS<sub>2</sub> film, at first, we deposit the molybdenum (Mo) metal on a sapphire substrate using a radio-frequency (RF) sputtering system. The metal deposition continues for 17 s under a 30 sccm argon (Ar) gas flow, while the RF power and background pressure are at 30 W and  $5 \times 10^{-3}$  Torr. Afterward, we place the sample with deposited Mo in a high-temperature furnace tube for further sulfurization. During the sulfurization procedure, we use Ar as the carrier gas with a flow rate of 200 sccm and place 0.25 g of sulfur powder upstream of the gas flow. The evaporation temperature for the sulfur powder is 160 °C, while the furnace pressure and growth temperature keep at 50 Torr and 850 °C, respectively. Figure S1 shows the picture and cross-sectional high-resolution transmission electron microscope (HRTEM) image of the MoS<sub>2</sub> film grown on a sapphire substrate via the above process. In Fig. S1, we can clearly observe its monolayer feature.

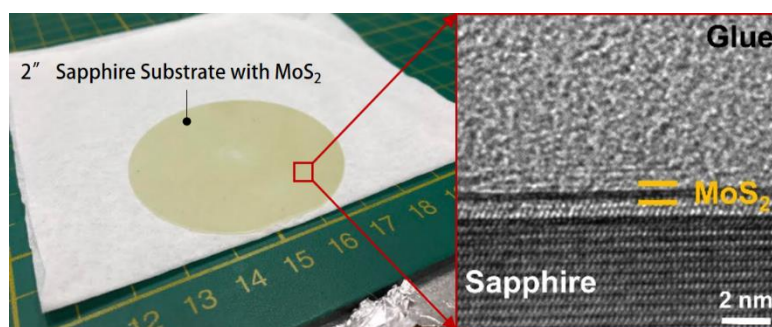

**Figure S1.** (left) Picture and (right) cross-sectional HRTEM image of the MoS<sub>2</sub> film grown on a sapphire substrate via the sputtering process.

### Supplementary Note 2: PL Enhancements of MoS<sub>2</sub> with Silver ND Arrays under Different Excitations

Figures S2(a) and (b) show the measured PL enhancement and corresponding enhanced PL spectra from MoS<sub>2</sub> covering with silver ND arrays with different  $D$  from 80 to 160 nm under  $\lambda_{exc} = 488, 532$ , and 633 nm laser excitations. For the ND array with  $D = 90$  nm, the SLR mode inside obviously misaligns with the gain spectrum, as in the theoretical electrical field enhancement in Fig. S2(c). Besides, the SLR mode also misaligns with all the used  $\lambda_{exc}$ , which leads to very few  $E'(\lambda_{exc})$  components and only about three times PL enhancement for all the excitation conditions. However, for the case with  $D$  of 110 nm, the PL enhancement under  $\lambda_{exc}$  of 633 nm is significantly stronger than those under  $\lambda_{exc} = 488$  and 532 nm because the SLR mode tends to align with  $\lambda_{exc} = 633$  nm and contributes more  $E'(\lambda_{exc})$  components for PL enhancement. The same trend still exists in the case with  $D = 160$  nm based on the same reason.

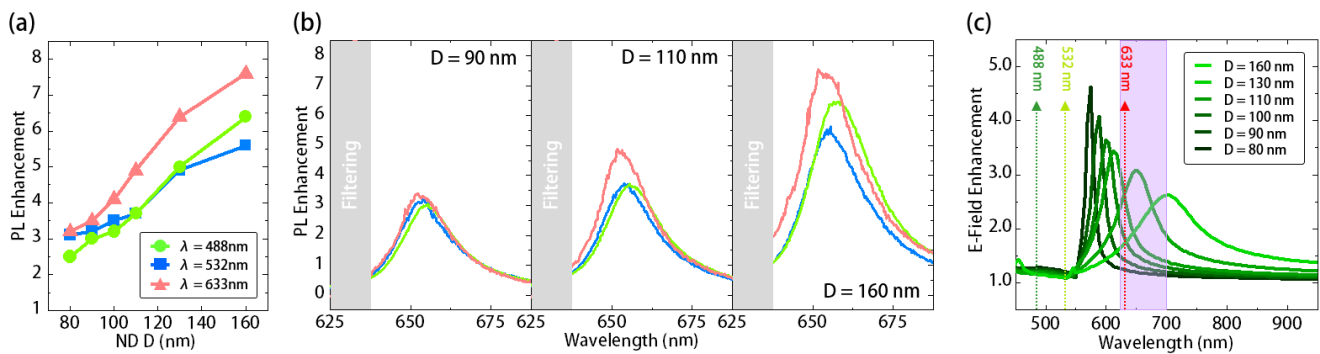

**Figure S2.** (a) The measured PL enhancement from MoS<sub>2</sub> covering with silver ND arrays with different  $D$  under different laser excitations. (b) The measured PL spectra from MoS<sub>2</sub> covering with silver ND arrays with  $D$  of 90, 110, and 160 nm under different laser excitations. (c) Theoretical electrical field enhancement by SLR modes in silver ND arrays with different  $D$ , as a function of wavelength.

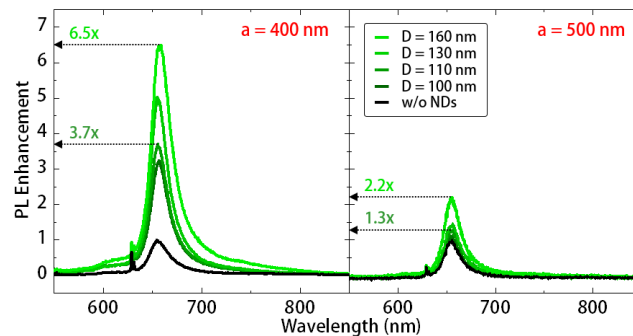

**Figure S3.** The measured PL spectra from MoS<sub>2</sub> covering with silver ND arrays with different  $D$  from 100 to 160 nm and lattice constants of (left) 400 and (right) 500 nm under a 532 nm laser excitation. For the silver ND arrays with  $D = 160$  and 110 nm, when their lattice constants increase from 400 to 500 nm, the PL enhancements degrade from 6.5 and 3.7 to 2.2 and 1.3, respectively.
